# Supplementary material
Source: HighWire-hosted journal article supplement (http://www.cmaj.ca/highwire/filestream/57727/field_highwire_adjunct_files/0/sero-mahmud-appendix_1.pdf)
Supplement: sero-mahmud-appendix_1.pdf [file sero-mahmud-appendix_1.pdf]

## **Appendix 1: Laboratory methods for hemagglutination inhibition assay used to detect IgG antibodies against the pandemic (H1N1) 2009 virus**

The A/California/04/2009 H1N1 virus isolate used in this assay was kindly provided by the Canadian National Microbiology Laboratory. Virus stocks were prepared at the Cadham Provincial Laboratory according to standard procedure.<sup>1</sup> Briefly, 1:10 serial dilution of the virus stock in primer binding site was prepared. Ten-days-old embryonated chicken eggs were inoculated with 100  $\mu$ L of one of the three virus dilutions (neat, 1:10 and 1:100). The eggs were incubated at 37°C for three days and then chilled at 4°C overnight. The allantoic fluid was collected using sterile 10-mL pipettes; the virus was aliquoted in 1-mL aliquots and stored frozen at -70°C.

### **Hemagglutination inhibition assay (HIA)**

HIA was performed according to a widely used WHO protocol.<sup>1</sup> Sera were treated with receptors destroying enzymes and hemadsorbed on guinea pig red blood cells. A 1:10 dilution of the serum specimens were prepared followed by 1:2 serial dilutions in 25  $\mu$ L PBS in a 96 microliter plates U bottom. Subject specimens were diluted in rows B–F of the microliter plate. Twenty five  $\mu$ L of PBS containing four hemagglutination units of the H1N1 California strain virus were added to each well. Row A of the microliter plate was saved as a control, where 25  $\mu$ L of uninfected allantoic fluid was added to each well. The plate was incubated for 30 minutes at room temperature, then 0.8% guinea pig red blood cells in 50  $\mu$ L was added to each well and incubated for one hour at room temperature. The serum titre was expressed as the reciprocal of the highest serum dilution where hemagglutination was inhibited.

### **Reference**

1. Webster R, Cox N, Stohr K. *WHO manual on animal influenza diagnosis and surveillance*. Geneva (Switzerland): World Health Organization; 2002.
